# Supplementary material for: “A Crazy Roller Coaster at the End”: A Qualitative Study of Death Preparedness With Caregivers of Persons With Dementia
Source: PubMed Central journal article supplement — SAGE Open Nurs. 2020 Aug 25;6:2377960820949111. doi: 10.1177/2377960820949111 (PMC7774442; doi:10.1177/2377960820949111), 2020-08-25
Supplement: sj-pdf-1-son-10.1177_2377960820949111.pdf [file sj-pdf-1-son-10.1177_2377960820949111.pdf]

Supplement. Semi-structured interview questions.

| <b>Preparedness Domain</b> | <b>Questions</b>                                                                                                                                                                                                                                                                                                                                                                             |
|----------------------------|----------------------------------------------------------------------------------------------------------------------------------------------------------------------------------------------------------------------------------------------------------------------------------------------------------------------------------------------------------------------------------------------|
| Medical                    | <ul style="list-style-type: none"> <li>• What events stand out to you from the last year of your family member's life?</li> <li>• Were these events that you expected?</li> <li>• What do you think was helpful in preparing for these events?</li> </ul>                                                                                                                                    |
| Psychosocial               | <ul style="list-style-type: none"> <li>• What relationships were important to you in the last year of your family member's life?</li> <li>• What was your relationship with your family member like?</li> <li>• What relationships were helpful to you?</li> <li>• What were your emotions like during this time?</li> <li>• Were you surprised by your emotions? Why or why not?</li> </ul> |
| Practical                  | <ul style="list-style-type: none"> <li>• What tasks did you have to have to complete for your family member?</li> <li>• What kind of services did you use after-death?</li> <li>• Were the tasks that you had to complete things you expected, or had done before?</li> <li>• What was helpful in completing these tasks?</li> </ul>                                                         |
| Spiritual                  | <ul style="list-style-type: none"> <li>• What are your beliefs around death and dying?</li> <li>• What beliefs did your family member have?</li> <li>• What traditions or practices did you follow when your family member was dying or afterwards?</li> </ul>                                                                                                                               |
